# Supplementary material for: Identification of rare de novo epigenetic variations in congenital disorders
Source: PubMed Central journal article supplement (PMC5970273; doi:10.1038/s41467-018-04540-x), 2018-05-25
Supplement: 41467_2018_4540_MOESM2_ESM.pdf [file 41467_2018_4540_MOESM2_ESM.pdf]

## Description of Additional Supplementary Files

File Name: Supplementary Data 1

Description: Clinical characterization of the cohort.

File Name: Supplementary Data 2

Description: DMRs identified in control families.

File Name: Supplementary Data 3

Description: DMRs identified in 2711 unrelated controls.

File Name: Supplementary Data 4

Description: DMRs identified in cases.

File Name: Supplementary Data 5

Description: DMR validation with bisulfite sequencing.

File Name: Supplementary Data 6

Description: CNVs detected with custom arrayCGH in cases.

File Name: Supplementary Data 7

Description: Rare SNVs within 75kb of DMRs in cases.

File Name: Supplementary Data 8

Description: Rare SNVs within 10kb of DMRs in 90 controls (1kGenomes).

File Name: Supplementary Data 9

Description: DMRs identified in multiple tissues in controls (Gencord).

File Name: Supplementary Data 10

Description: Gene expression and DMRs identified in 90 controls (1kGenomes).

File Name: Supplementary Data 11

Description: Putative homozygous deletions (clustered failed detection p values).
